# Supplementary material for: Proteomic insights into composition-dependent effects of microplastics on freshwater microalgae Chlamydomonas reinhardtii
Source: Royal Society of Chemistry journal article supplement (doi:10.1039/d4en00300d), 2024-01-01
Supplement: d4en00300d1.pdf [file d4en00300d1.pdf]

### Supplementary material

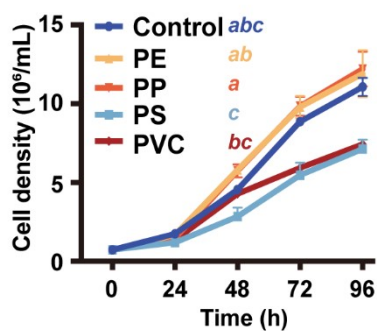

**Fig. S1**

Cell density of *C. reinhardtii* exposed to the four MPs at the concentration of 50 mg/L over 96 h. Significant differences among groups are indicated by different letters.

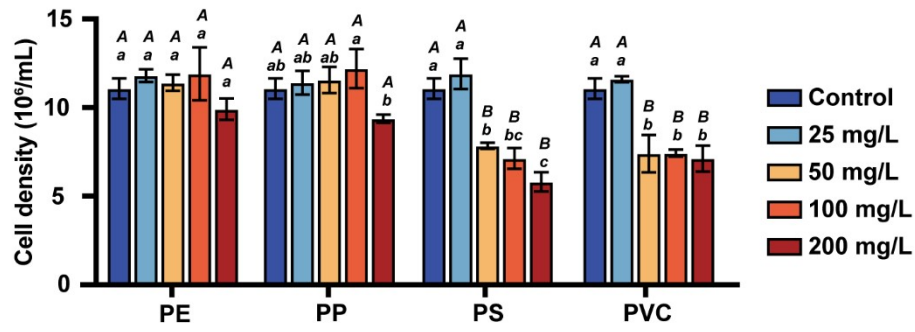

**Fig. S2**

Cell density of *C. reinhardtii* exposed to the four MPs at the different concentrations for 96 h. Significant differences among groups with different concentrations for one type of microplastic or among different microplastics at the same concentrations are indicated by distinct lowercase or capital letters, respectively.

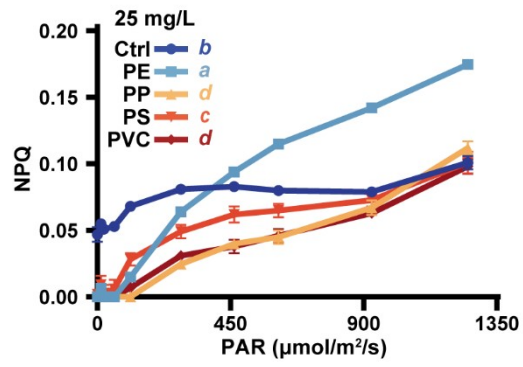

**Fig. S3**

NPQ in algae under different illumination conditions following incubation with the four MPs at the consistent concentrations of 25 mg/L

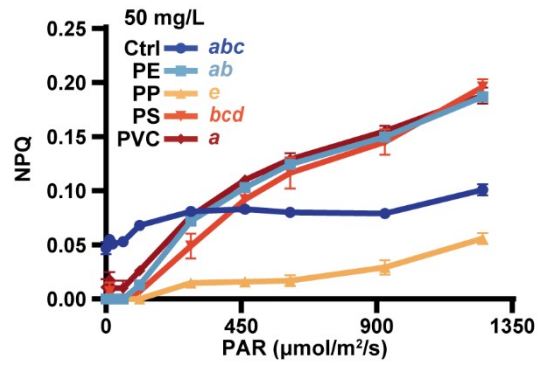

**Fig. S4**

NPQ in algae under different illumination conditions following incubation with the four MPs at the consistent concentrations of 50 mg/L

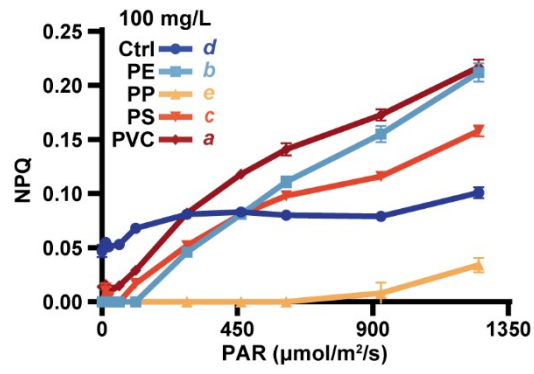

**Fig. S5**

NPQ in algae under different illumination conditions following incubation with the four MPs at the consistent concentrations of 100 mg/L.

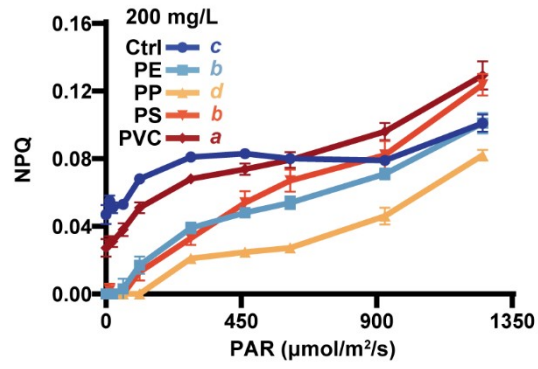

**Fig. S6**

NPQ in algae under different illumination conditions following incubation with the four MPs at the consistent concentrations of 200 mg/L.
