# Supplementary figures and images for: Proteomic insights into composition-dependent effects of microplastics on freshwater microalgae Chlamydomonas reinhardtii
Source: Royal Society of Chemistry journal article supplement (doi:10.1039/d4en00300d), 2024-01-01

Raw data of the Fig8F

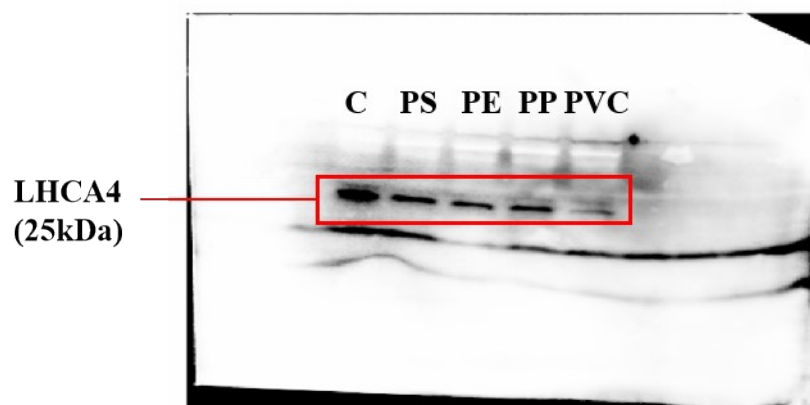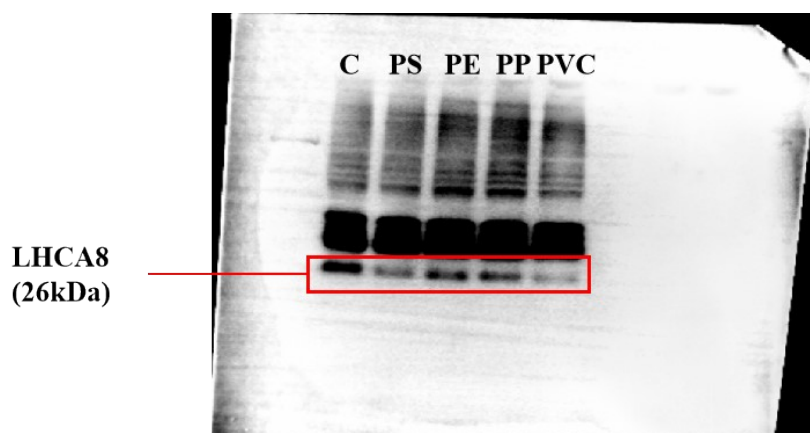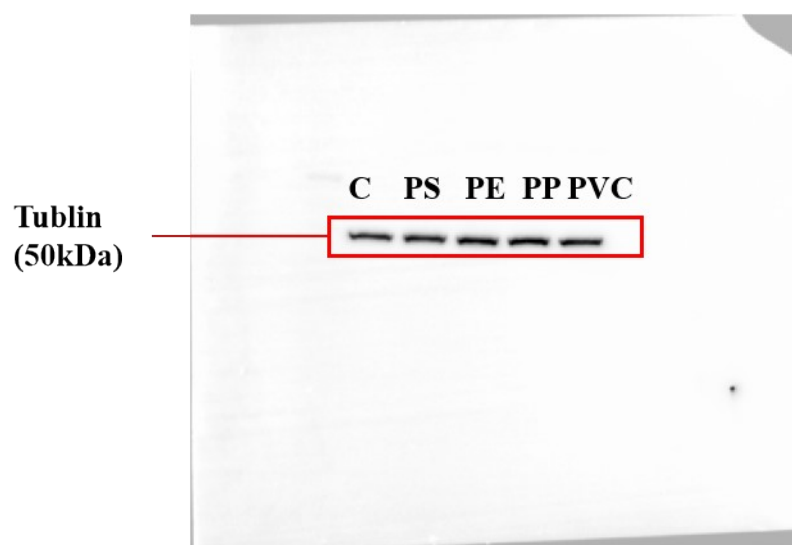

Supplement: d4en00300d2.pdf [file d4en00300d2.pdf]
